# Supplementary material for: Development of a Patient-Derived 3D Immuno-Oncology Platform to Potentiate Immunotherapy Responses in Ascites-Derived Circulating Tumor Cells
Source: MDPI journal article supplement (doi:10.3390/cancers15164128), 2023-08-16
Supplement: s1 [file s1]

**Table S3. Gating used to Observe Cell Types or Protein Expression for Flow Cytometry of Patient Ascites.**

| <b>Desired Expression</b>                     | <b>Gates</b>                                                    |
|-----------------------------------------------|-----------------------------------------------------------------|
| T cells                                       | CD3+ / CD45+                                                    |
| Helper T cell lymphocytes of total T cells    | $(\text{CD4+} / \text{CD3+}) \div (\text{CD3+} / \text{CD45+})$ |
| Cytotoxic T cell lymphocytes of total T cells | $(\text{CD8+} / \text{CD3+}) \div (\text{CD3+} / \text{CD45+})$ |
| PD1                                           | PD1+ / CD3+                                                     |
| PDL1                                          | PDL1+ / EpCAM+                                                  |
