# Supplementary material for: Development of a Patient-Derived 3D Immuno-Oncology Platform to Potentiate Immunotherapy Responses in Ascites-Derived Circulating Tumor Cells
Source: MDPI journal article supplement (doi:10.3390/cancers15164128), 2023-08-16
Supplement: s1 [file s1]

**Table S2. Antibodies used for Flow Cytometry of Patient Ascites.**

| <b>Antibody</b> | <b>Fluorophore</b> | <b>Supplier</b> | <b>Catalog</b> | <b>Panel</b> | <b>Concentration</b> |
|-----------------|--------------------|-----------------|----------------|--------------|----------------------|
| CD3             | PE                 | BD Biosciences  | 552127         | 1            | 1:200                |
| CD4             | BV421              | BioLegend       | 357423         | 1            | 1:200                |
| CD8             | AF488              | BioLegend       | 301024         | 1            | 1:200                |
| PD1             | AF700              | BioLegend       | 329951         | 1            | 1:200                |
| CD45            | APC                | BioLegend       | 368511         | 1 & 2        | 1:200                |
| EpCAM           | FITC               | BioLegend       | 324204         | 2            | 1:200                |
| PDL1            | PE-Cy7             | BioLegend       | 329717         | 2            | 1:200                |
