# Supplementary material for: Development of a Patient-Derived 3D Immuno-Oncology Platform to Potentiate Immunotherapy Responses in Ascites-Derived Circulating Tumor Cells
Source: MDPI journal article supplement (doi:10.3390/cancers15164128), 2023-08-16
Supplement: s1 [file s1]

**Table S5. Patient Data for Ascites Samples**

| <b>Patient Number</b> | <b>Platinum Status</b> | <b>BRCA Status</b>    | <b>Prior PARP</b> |
|-----------------------|------------------------|-----------------------|-------------------|
| 1                     | Refractory             | Wild-Type             | Untreated         |
| 2                     | Resistant              | <i>BRCA1</i> Mutation | Treated           |
| 3                     | Resistant              | Wild-Type             | Treated           |
| 4                     | Refractory             | Wild-Type             | Untreated         |
| 5                     | Resistant              | Wild-Type             | Treated           |
| 6                     | Resistant              | Wild-Type             | Treated           |
| 7                     | Resistant              | Wild-Type             | Untreated         |
| 8                     | Sensitive              | <i>BRCA1</i> Mutation | Untreated         |
| 9                     | Resistant              | Wild-Type             | Untreated         |
