# Supplementary material for: Development of a Patient-Derived 3D Immuno-Oncology Platform to Potentiate Immunotherapy Responses in Ascites-Derived Circulating Tumor Cells
Source: MDPI journal article supplement (doi:10.3390/cancers15164128), 2023-08-16
Supplement: s1 [file s1]

**Table S4. Antibodies used for Flow Cytometry of Solid Patient Sample for Immune Activation.**

| <b>Antibody</b> | <b>Fluorophore</b> | <b>Supplier</b>          | <b>Catalog</b> | <b>Concentration</b> |
|-----------------|--------------------|--------------------------|----------------|----------------------|
| CD45            | BV711              | BioLegend                | 304050         | 1:200                |
| CD3             | AF700              | BioLegend                | 300424         | 1:200                |
| CD4             | BV785              | BioLegend                | 300554         | 1:200                |
| CD8             | PerCP Cy5.5        | Thermo Fisher Scientific | BDB560662      | 1:200                |
| TIM-3           | APC                | BioLegend                | 345012         | 1:200                |
| PD-1            | BV421              | BioLegend                | 329920         | 1:200                |
| CD69            | FITC               | BioLegend                | 310904         | 1:200                |
| CD38            | PE                 | BioLegend                | 303506         | 1:200                |
| CTLA-4          | BV605              | BioLegend                | 369609         | 1:200                |
| LAG-3           | PE-Cy7             | BioLegend                | 369309         | 1:200                |
