# Supplementary material for: Development of a Patient-Derived 3D Immuno-Oncology Platform to Potentiate Immunotherapy Responses in Ascites-Derived Circulating Tumor Cells
Source: MDPI journal article supplement (doi:10.3390/cancers15164128), 2023-08-16
Supplement: s1 [file s1]

**Table S1. Antibodies used for IF Imaging of PDOTS**

| <b>Antibody</b> | <b>Fluorophore</b> | <b>Supplier</b> | <b>Catalog</b> | <b>Panel</b> | <b>Concentration</b> |
|-----------------|--------------------|-----------------|----------------|--------------|----------------------|
| CD45            | AF488              | BioLegend       | 304017         | 1            | 1:100                |
| EpCAM           | PE                 | BioLegend       | 357423         | 1 & 2        | 1:100                |
| CD8             | AF488              | BioLegend       | 301024         | 2            | 1:100                |
| PD-L1           | APC                | BioLegend       | 374513         | 2            | 1:100                |
